# Supplementary material for: LAG-3 potentiates the survival of Mycobacterium tuberculosis in host phagocytes by modulating mitochondrial signaling in an in-vitro granuloma model
Source: PubMed Central journal article supplement (PMC5589099; doi:10.1371/journal.pone.0180413), 2017-09-07
Supplement: pone.0180413.s003.pdf [file pone.0180413.s003.pdf]

# Supplemental Figure 3

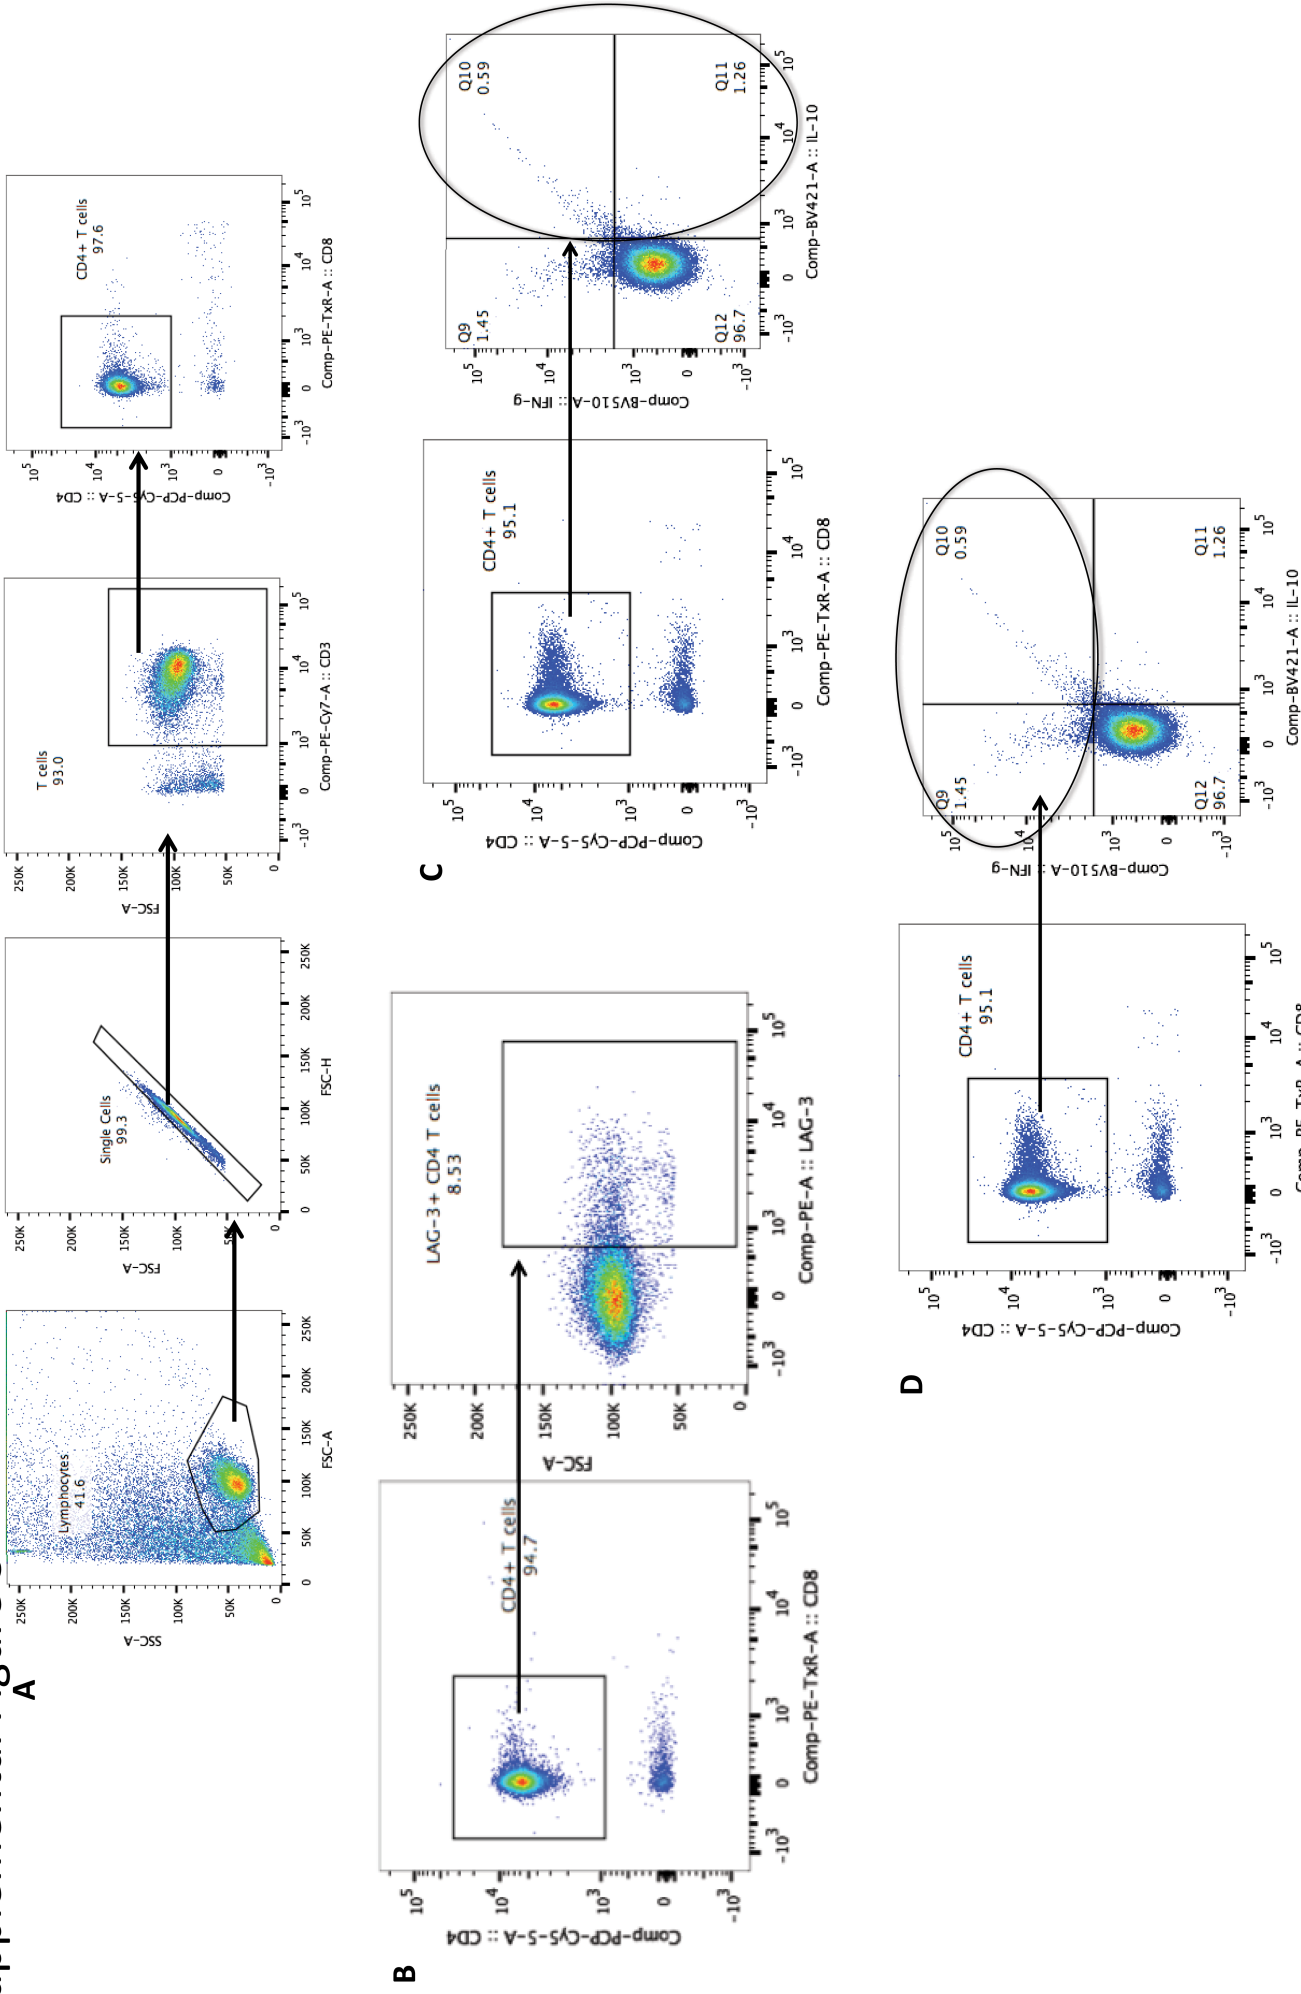

**SUPPLEMENTAL FIGURE 3** The gating strategies utilized in **Fig. 3**. (A) The gating strategy used to select for CD4 T cells in all images. Here, we first gated for the lymphocyte population, before gating for singlets, we then went on to select for CD3<sup>+</sup> T cells before graphing for CD4 vs. CD8 in order to obtain CD4<sup>+</sup>CD8<sup>-</sup> T cells. (B) The gating strategy used select for CD4 T cells expressing LAG-3. (C) The gating strategy used select for CD4 T cells expressing IFN- $\gamma$ . A quadrant gate had been set for IL-10 vs. IFN- $\gamma$ , and we analyzed all IFN- $\gamma$ <sup>+</sup> cells. (D) The gating strategy used select for CD4 T cells expressing IFN- $\gamma$ . A quadrant gate had been set for IL-10 vs. IFN- $\gamma$ , and we analyzed all IFN- $\gamma$ <sup>+</sup> cells.
