# Supplementary material for: LAG-3 potentiates the survival of Mycobacterium tuberculosis in host phagocytes by modulating mitochondrial signaling in an in-vitro granuloma model
Source: PLOS journal article supplement (doi:10.1371/journal.pone.0180413), 2017-09-07
Supplement: S1 (10.1371/journal.pone.0180413.s001) [file journal.pone.0180413.s001]

# Supplemental Figure 1

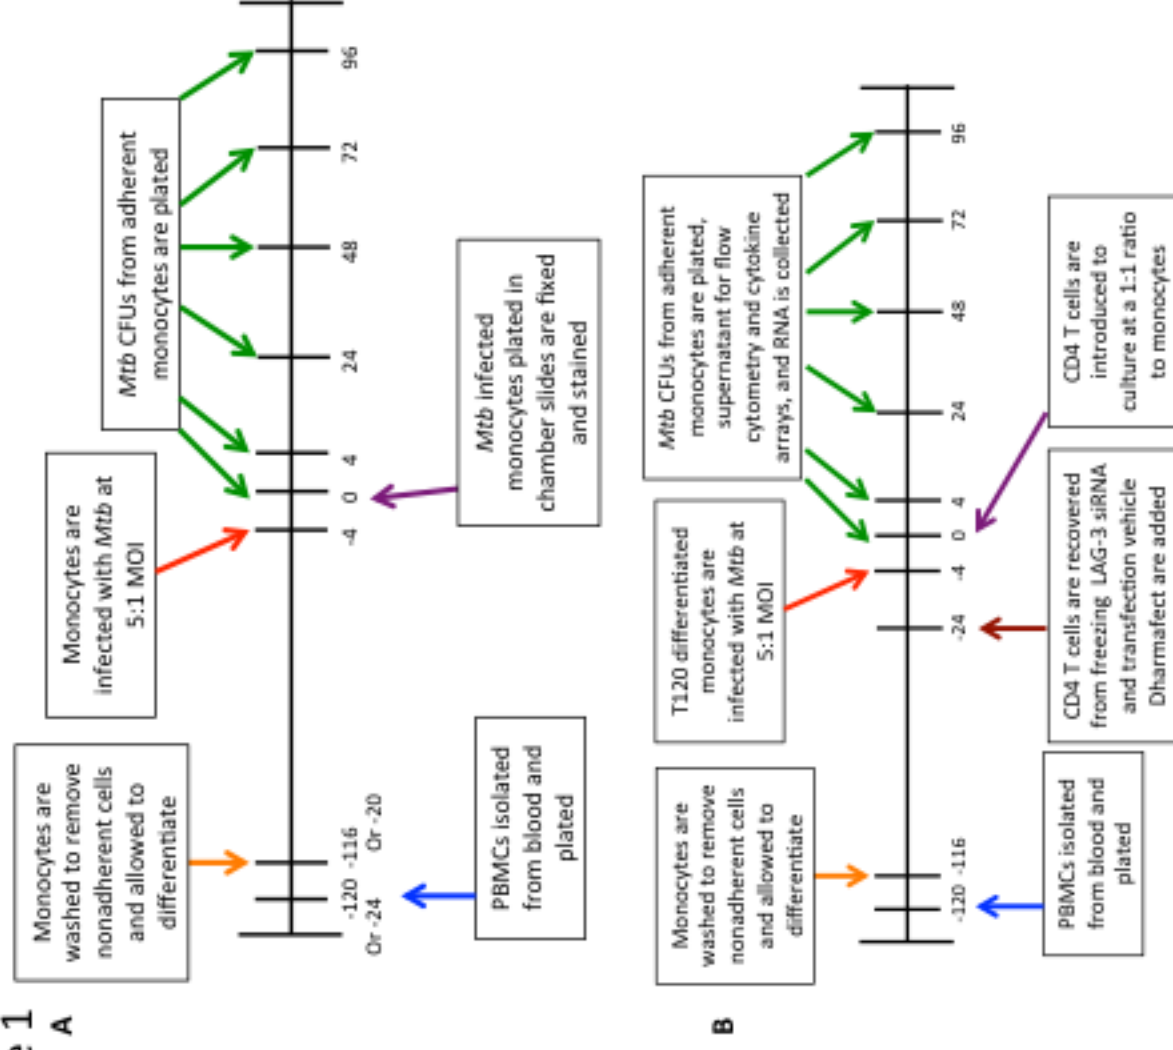

**SUPPLEMENTAL FIGURE 1 Experimental Timelines (A)** Timeline illustrating the experimental design to observe the differences in initial uptake of *Mtb*, the bacterial burden over the course of 96 hours post-infection, and the cellular morphology between T24 monocytes and T120 differentiated macrophages. **(B)** The timeline of the co-culture experiment designed to observe the effect of LAG-3 silencing in T cells over the course of *Mtb* infection the above-described model.
