# Supplementary material for: LAG-3 potentiates the survival of Mycobacterium tuberculosis in host phagocytes by modulating mitochondrial signaling in an in-vitro granuloma model
Source: PLOS journal article supplement (doi:10.1371/journal.pone.0180413), 2017-09-07
Supplement: S4 (10.1371/journal.pone.0180413.s004) [file journal.pone.0180413.s004]

## Supplemental Table 1.

### A. Details of flow cytometry

The samples were stained with the following fluorochrome-conjugated antibodies in stain buffer (PBS, 1% BSA, 0.5% sodium azide):

|               |                                   |
|---------------|-----------------------------------|
| CD4           | PerCP-Cy5.5, BD Biosciences)      |
| IL-10         | BV421, Biolegend, San Diego, CA)  |
| IFN- $\gamma$ | BV510, BD Biosciences)            |
| LAG-3         | PE, R&D Systems, Minneapolis, MN) |
| CD8           | PE-TxR, Invitrogen)               |
| CD3           | PE-Cy7, BD Biosciences)           |

Samples were run on a BD Fortessa flow cytometer (BD Biosciences). Flow cytometric analysis was performed with FlowJo software (version 10; Treestar, Ashland, OR).

### B. Details of confocal microscopy

Primary antibodies against the following proteins were used:

|            |                                   |
|------------|-----------------------------------|
| MAC387     | (1:50, IgG1 mouse, Dako)          |
| <i>Mtb</i> | (1:100, rabbit, Molecular Probes) |
| TO-PRO 3   | (1:2000, Molecular Probes)        |

The following secondary antibodies conjugated to fluorochromes from Molecular Probes at a 1:1000 concentration derived from goat:

Alexa Fluor 488 anti-mouse IgG1  
Alexa Fluor 568 anti-rabbit.

Imaging was performed with a Leica True Confocal Laser Scanning Microscope SP2 laser scanning confocal microscope (Leica; Buffalo Grove, IL), and the images were analyzed with Velocity 3D image analysis software (Perkin Elmore; Waltham, MA)
